# Supplementary material for: Seasonal Plant Nitrogen Use and Soil N pools in Intermediate Wheatgrass (Thinopyrum intermedium)
Source: MDPI journal article supplement (doi:10.3390/agriculture13020468), 2023-02-16
Supplement: s1 [file s1]

Table S1. 30 year normal and 2018 average temperature and monthly rainfall for growing season in Rosemount, MN

|              |                                        | May  | June | July | Aug  | Sept | Oct |
|--------------|----------------------------------------|------|------|------|------|------|-----|
|              | precipitation (cm)                     | 10.3 | 12.0 | 11.4 | 12.0 | 9.2  | 7.3 |
| 30 year mean | avg temperature ( $^{\circ}\text{C}$ ) | 14.3 | 19.6 | 21.9 | 20.7 | 16.0 | 8.9 |
| 2017 season  | precipitation (cm)                     | 10.9 | 15.4 | 11.1 | 9.9  | 15.7 | 9.1 |
|              | avg temperature ( $^{\circ}\text{C}$ ) | 18.6 | 21.4 | 22.0 | 21.1 | 17.4 | 6.2 |

Table S2. ANOVA results for NUE in detail.

| Factor                       | Total  | PNUE   |        | Grain | NIE    |        |        | Grain  |
|------------------------------|--------|--------|--------|-------|--------|--------|--------|--------|
|                              |        | Root   | Shoot  |       | Total  | Root   | Shoot  |        |
| 1 year old stand             |        |        |        |       |        |        |        |        |
| Treatment                    | 0.1267 | 0.0007 | 0.001  | 0.289 | 0.1515 | 0.8123 | 0.1423 | 0.3783 |
| Sampling time                | <.0001 | <.0001 | <.0001 | --    | 0.4393 | 0.8727 | 0.0655 | --     |
| Treatment X<br>sampling time | 0.081  | 0.0193 | 0.3027 | --    | 0.7486 | 0.446  | 0.9454 | --     |
| 2 year old stand             |        |        |        |       |        |        |        |        |
| Treatment                    | 0.0572 | 0.0016 | 0.5069 | 0.007 | 0.9246 | 0.1639 | 0.6658 | 0.7418 |
| Sampling time                | 0.0343 | 0.0027 | <.0001 | --    | 0.0019 | 0.0067 | 0.0032 | --     |
| Treatment X<br>sampling time | 0.4381 | 0.5174 | 0.0545 | --    | 0.5366 | 0.9751 | 0.7259 | --     |

Statistics were performed based on a complete randomized block design. For each tissue type, statistics were performed on dates for which the nitrogen use efficiency was calculated for each tissue type, respectively (Total PNUE and NIE were calculated for the maturity and fall regrowth dates only, were root, shoot, and grain PNUE and NIE were also calculated).

Table S3. Results of analysis of variance to test for significant nitrogen addition treatment, sampling time, and interaction effects on soil NO<sub>3</sub><sup>-</sup>-N (0-15), soil NH<sub>4</sub><sup>+</sup>-N (0-15), soil mineralized NO<sub>3</sub><sup>-</sup>-N (0-15 cm), and soil mineralized NH<sub>4</sub><sup>+</sup>-N (0-15 cm) in 1 year old and 2 year old intermediate wheatgrass stands

| Factor                    | Mineral N (mg kg <sup>-1</sup> ) |                 |        | Mineralized N (mg kg <sup>-1</sup> ) |                 |        | Mineralization rate (mg kg <sup>-1</sup> day <sup>-1</sup> ) |                |            | Soil N (%) |
|---------------------------|----------------------------------|-----------------|--------|--------------------------------------|-----------------|--------|--------------------------------------------------------------|----------------|------------|------------|
|                           | NO <sub>3</sub> -                | NH <sub>4</sub> | Total  | NO <sub>3</sub> -                    | NH <sub>4</sub> | Total  | nitrification                                                | ammonification | total Nmin |            |
| 1 year old stand          |                                  |                 |        |                                      |                 |        |                                                              |                |            |            |
| Treatment                 | 0.0011                           | 0.0122          | 0.0005 | 0.0658                               | 0.0302          | 0.0088 | 0.2039                                                       | 0.0378         | 0.0169     | 0.3426     |
| Sampling time             | <.0001                           | 0.0002          | <.0001 | <.0001                               | 0.0016          | <.0001 | <.0001                                                       | 0.0007         | <.0001     | 0.0013     |
| Treatment X sampling time | 0.0016                           | 0.0402          | 0.0029 | 0.0412                               | 0.1138          | 0.1126 | 0.0866                                                       | 0.0671         | 0.0804     | 7267       |
| 2 year old stand          |                                  |                 |        |                                      |                 |        |                                                              |                |            |            |
| Treatment                 | 0.0824                           | 0.1966          | 0.1451 | 0.8115                               | 0.1822          | 0.2031 | 0.7663                                                       | 0.2301         | 0.258      | 0.3317     |
| Sampling time             | 0.0009                           | 0.0185          | 0.015  | 0.0011                               | 0.0583          | 0.049  | 0.0054                                                       | 0.0177         | 0.0562     | 0.0594     |
| Treatment X sampling time | 0.0328                           | 0.0747          | 0.0533 | 0.0955                               | 0.1008          | 0.0461 | 0.1387                                                       | 0.135          | 0.0574     | 0.039      |

\* = P < 0.05; \*\* = P < 0.01; \*\*\* = P < 0.001; NS= not significant, -- = data not available for this test
